# Supplementary material
Source: ML conference proceedings conference paper supplement (https://openaccess.thecvf.com/content/CVPR2021/html/Gao_Information_Bottleneck_Disentanglement_CVPR_2021_paper.html)
Supplement: Supplementary file 2 [file Gao_Information_Bottleneck_Disentanglement_CVPR_2021_supplemental.zip]

Archive with 2 entries (2 files):
- Cinderella_by_Anna-Popplewell.mkv
- 01650-supp.pdf
